# Supplementary material for: Transcranial magnetic stimulation (TMS) inhibits cortical dendrites
Source: PubMed Central journal article supplement (PMC4811769; doi:10.7554/elife.13598), 2016-03-18
Supplement: elife-13598-fig1-data1.pdf [file elife-13598-fig1-data1.pdf]

Source data: Figure 1

|    | Integral ( $\Delta F/F * ms$ ) |             | Amplitude ( $\Delta F/F$ ) |         |               |         |
|----|--------------------------------|-------------|----------------------------|---------|---------------|---------|
|    |                                |             | 1st component              |         | 2nd component |         |
|    | HS                             | HS+TMS      | HS                         | HS+TMS  | HS            | HS+TMS  |
| 1  | 6417.40798                     | 4491.94593  | 4.48152                    | 3.35724 | 5.37158       | 3.87253 |
| 2  | 4250.9649                      | 2916.89863  | 3.98382                    | 3.59984 | 5.18377       | 4.72779 |
| 3  | 2140.39701                     | 1595.39302  | 3.48996                    | 2.67636 | 3.21066       | 3.18638 |
| 4  | 18269.43596                    | 10910.19211 | 22.7865                    | 17.756  | 17.0107       | 15.5202 |
| 5  | 4782.63198                     | 2076.24575  | 4.76702                    | 3.684   | 5.73755       | 5.96591 |
| 6  | 4994.04079                     | 4304.98143  | 7.7                        | 6.6     | 7.4           | 5.8     |
| 7  | 4183.666547                    | 2991.411615 | 4.63491                    | 3.72264 | 5.58804       | 3.91326 |
| 8  | 5401.886305                    | 1471.961019 | 4.86384                    | 1.86808 | 6.10376       | 2.82619 |
| 9  | 3065.697341                    | 1727.26411  | 3.45045                    | 1.81816 | 4.67765       | 3.06919 |
| 10 | 1402.012191                    | 888.488839  | 3.20611                    | 2.13741 | 2.41401       | 1.70993 |
| 11 | 3030.7                         | 1321.54     | 3                          | 1.7     | 3.89          | 2       |
| 12 | 3169.07                        | 538.37      | 4.60802                    | 2.63728 | 4.92847       | 3.43839 |
| 13 | 972.23                         | 764.8       | 1.43                       | 0.22232 | 2.366         | 1.85246 |
| 14 | 2867.96                        | 1059.43     | 3.92                       | 2.98    | 5.85          | 5.21    |
| 15 | 3317.30055                     | 1004.26866  | 17.6275                    | 11.3076 | 7.56435       | 4.25859 |
| 16 | 3787.45685                     | 2134.49819  | 14.5968                    | 7.85005 | 4.8308        | 3.19071 |
| 17 | 840.282479                     | 378.18018   | 15.0552                    | 10.6564 | 10.5944       | 8.30207 |
